# Supplementary material for: Dynamic behavior of the locus coeruleus during arousal-related memory processing in a multi-modal 7T fMRI paradigm
Source: eLife journal article supplement (doi:10.7554/elife.52059), 2020-06-24
Supplement: fig4-data1 [file elife-52059-fig4-data1-v2.rdata]

Archive with 1 entries (1 files):
- elife-52059-fig4-data1-v2.rdata.out
